# Supplementary material for: The Definitions of Health Apps and Medical Apps From the Perspective of Public Health and Law: Qualitative Analysis of an Interdisciplinary Literature Overview
Source: PubMed Central journal article supplement (PMC9664324; doi:10.2196/37980), 2022-10-31
Supplement: mhealth_v10i10e37980_app1.pdf [file mhealth_v10i10e37980_app1.pdf]

Multimedia Appendix 1: Word clouds of definitions for health apps and medical apps (including word count per term)

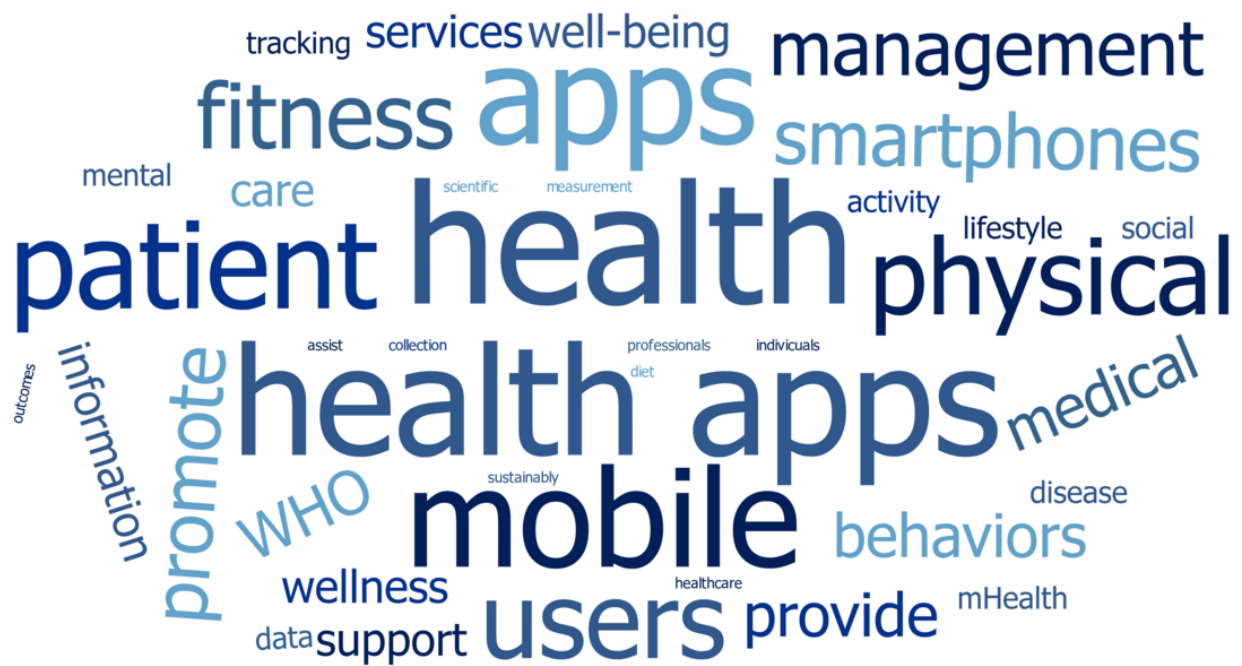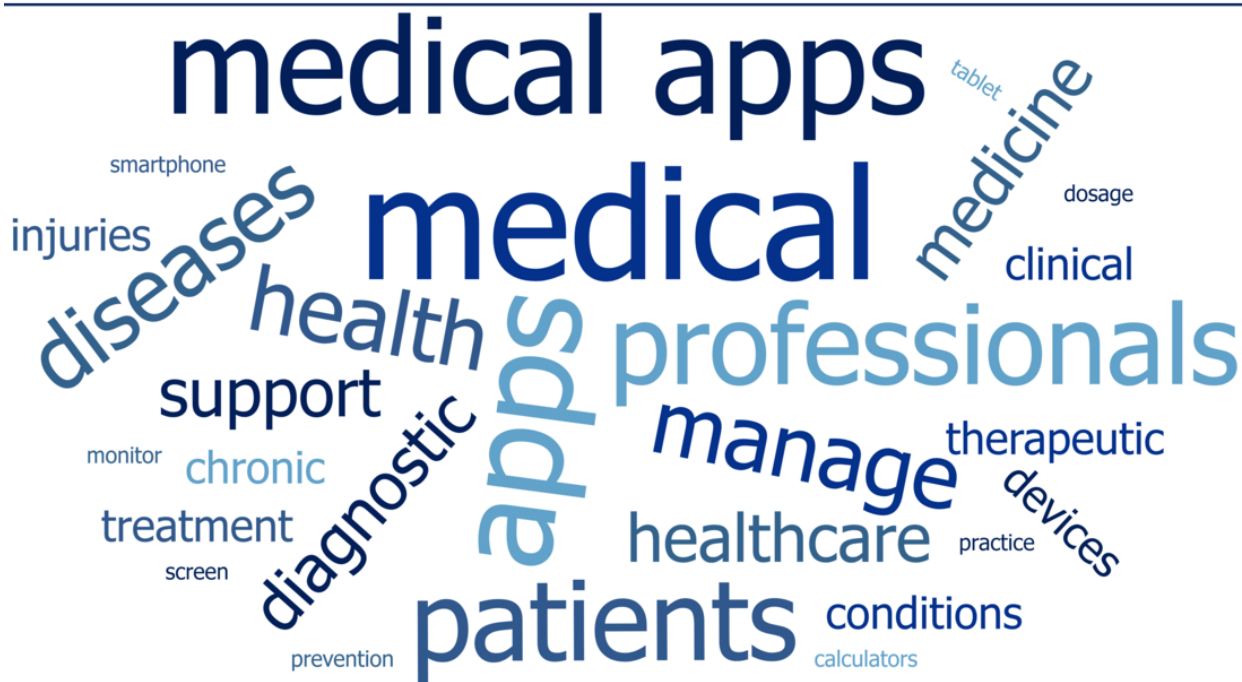

Words with the same meaning but different spelling (e.g., “app”, “apps,” or “application”) were merged for the display of the word clouds. For transparency, the count of the individual terms is listed in the table below. Terms that were stated only once (including merging different spelling) were excluded from the word clouds.

| Health Apps |                                                                                                                                                        | Medical Apps |                                                                        |
|-------------|--------------------------------------------------------------------------------------------------------------------------------------------------------|--------------|------------------------------------------------------------------------|
| Total count | Term (individual count)                                                                                                                                | Total count  | Term (individual count)                                                |
| 35          | <b>health</b> (23) + healthy (6) + health-related (3) + health-promoting (2) + health-conscious (1)                                                    | 21           | <b>medical</b> (21)                                                    |
| 33          | <b>health apps</b> (17) + health applications (6) + mHealth apps (5) + health app (2) + mobile health (mHealth) applications (2) + healthcare apps (1) | 20           | <b>apps</b> (16) + applications (3) + app (1)                          |
| 25          | <b>apps</b> (15) + applications (6) + app (2) + application (2)                                                                                        | 16           | <b>medical apps</b> (12) + medical app (2) + medical applications (2)  |
| 12          | <b>mobile</b> (outside “mobile health apps”)                                                                                                           | 10           | <b>professionals</b> (8) + professional (1) + professions (1)          |
| 10          | <b>patient</b> (6) + patients (4)                                                                                                                      | 9            | <b>health</b> (8) + health-related (1)                                 |
| 9           | <b>physical</b> (6) + physiological (3)                                                                                                                | 9            | <b>patients</b>                                                        |
| 9           | <b>users</b> (7) + user (2)                                                                                                                            | 7            | <b>diseases</b> (5) + disease (2)                                      |
| 8           | <b>fitness</b> (6) + fitness related (1) + fit (1)                                                                                                     | 7            | <b>manage</b> (4) + management (1) + self-manage (2)                   |
| 7           | <b>smartphones</b> (3) + phone (1) + smartphone (1) + phone-based (1) + mobile-phone (1)                                                               | 6            | <b>diagnostic</b> (2) + diagnostics (2) + diagnose (1) + diagnosed (1) |
| 7           | <b>promote</b> (3) + promoting (2) + promotion (2)                                                                                                     | 6            | <b>support</b> (5) + supportive (1)                                    |
| 7           | <b>management</b> (4) + self-management (2) + manage (1)                                                                                               | 5            | <b>healthcare</b> (4) + health care (1)                                |
| 6           | <b>behaviors</b> (3) + behavior (2) + behavioral (1)                                                                                                   | 5            | <b>medicine</b> (4) + medicinae (1)                                    |
| 6           | <b>medical</b> (4) + medication (1) + medicine (1)                                                                                                     | 4            | <b>chronic</b>                                                         |
| 6           | <b>provide</b> (4) + providing (1) + provided (1)                                                                                                      | 4            | <b>therapeutic</b> (2) + therapists (1) + therapy (1)                  |
| 6           | <b>WHO</b>                                                                                                                                             | 4            | <b>clinical</b> (3) + clinics (1)                                      |
| 5           | <b>information</b>                                                                                                                                     | 3            | <b>devices</b>                                                         |
| 5           | <b>support</b> (4) + supporting (1)                                                                                                                    | 3            | <b>treatment</b> (2) + treat (1)                                       |
| 5           | <b>services</b>                                                                                                                                        | 3            | <b>injuries</b>                                                        |
| 5           | <b>well-being</b>                                                                                                                                      | 3            | <b>conditions</b> (2) + condition (1)                                  |
| 5           | <b>wellness</b>                                                                                                                                        | 2            | <b>calculators</b>                                                     |
| 5           | <b>care</b>                                                                                                                                            | 2            | <b>prevention</b>                                                      |
| 4           | <b>mHealth</b> (outside “mHealth apps” and “mobile health (mHealth) applications”)                                                                     | 2            | <b>dosage</b> (1) + dosages (1)                                        |
| 4           | <b>tracking</b> (2) + track (1) + trackers (1)                                                                                                         | 2            | <b>practice</b>                                                        |
| 4           | <b>activity</b> (2) + active (2)                                                                                                                       | 2            | <b>screen</b>                                                          |
| 4           | <b>disease</b> (3) + disease-related (1)                                                                                                               | 2            | <b>smartphone</b>                                                      |
| 4           | <b>social</b>                                                                                                                                          | 2            | <b>tablet</b>                                                          |
| 4           | <b>lifestyle</b>                                                                                                                                       | 2            | <b>monitor</b>                                                         |

| <b>Health Apps</b> |                                                   | <b>Medical Apps</b> |                                |
|--------------------|---------------------------------------------------|---------------------|--------------------------------|
| <b>Total count</b> | <b>Term (individual count)</b>                    | <b>Total count</b>  | <b>Term (individual count)</b> |
| 4                  | <b>data</b>                                       |                     |                                |
| 4                  | <b>mental</b>                                     |                     |                                |
| 3                  | <b>healthcare</b> (outside “healthcare apps”)     |                     |                                |
| 3                  | <b>measurement</b> (2) + <b>measuring</b> (1)     |                     |                                |
| 3                  | <b>individuals</b>                                |                     |                                |
| 3                  | <b>devices</b> (2) + <b>device</b> (1)            |                     |                                |
| 3                  | <b>sustainably</b>                                |                     |                                |
| 3                  | <b>scientific</b>                                 |                     |                                |
| 3                  | <b>collection</b> (2) + <b>collect</b> (1)        |                     |                                |
| 3                  | <b>diet</b>                                       |                     |                                |
| 3                  | <b>outcomes</b> (2) + <b>outcome</b> (1)          |                     |                                |
| 3                  | <b>professionals</b> (2) + <b>professions</b> (1) |                     |                                |
| 3                  | <b>assist</b> (2) + <b>assistants</b> (1)         |                     |                                |
