# Supplementary material for: The Definitions of Health Apps and Medical Apps From the Perspective of Public Health and Law: Qualitative Analysis of an Interdisciplinary Literature Overview
Source: PubMed Central journal article supplement (PMC9664324; doi:10.2196/37980), 2022-10-31
Supplement: mhealth_v10i10e37980_app2.pdf [file mhealth_v10i10e37980_app2.pdf]

## Multimedia Appendix 2: Overview of criteria included in the definitions of health apps and medical apps

Table 1. Overview of criteria included in definitions for health apps

| No. | Year | Author                         | Criteria included in the definition of health apps |            |                      |        |            |      |                         |
|-----|------|--------------------------------|----------------------------------------------------|------------|----------------------|--------|------------|------|-------------------------|
|     |      |                                | User                                               | Health aim | Definition of Health | Device | Regulation | Data | Technological functions |
| 1   | 2011 | Klasnja & Pratt (USA)          |                                                    |            |                      | ✓      |            | ✓    | ✓                       |
| 2   | 2013 | Scherenberg & Kramer (Germany) |                                                    | ✓          | ✓                    | ✓      |            |      |                         |
| 3   | 2014 | Albrecht et al. (Germany)      | ✓                                                  | ✓          | ✓                    |        |            | ✓    |                         |
| 4   | 2014 | Aungst et al. (USA)            | ✓                                                  | ✓          |                      |        |            | ✓    | ✓                       |
| 5   | 2014 | Boudreaux et al. (USA)         |                                                    | ✓          |                      | ✓      |            | ✓    |                         |
| 6   | 2014 | European Commission (Belgium)  | ✓                                                  | ✓          |                      |        |            |      |                         |
| 7   | 2014 | Gehring et al. (Germany)       |                                                    | ✓          |                      | ✓      |            | ✓    | ✓                       |
| 8   | 2014 | Powell et al. (USA)            |                                                    | ✓          |                      | ✓      |            |      |                         |
| 9   | 2015 | Aitken & Lyle (USA)            | ✓                                                  | ✓          |                      |        |            |      |                         |
| 10  | 2015 | Lucht et al. (Germany)         |                                                    | ✓          |                      |        |            | ✓    |                         |
| 11  | 2016 | Albrecht & von Jan (Germany)   | ✓                                                  | ✓          | ✓                    |        |            |      |                         |
| 12  | 2017 | Kramer (Germany)               | ✓                                                  | ✓          |                      |        |            | ✓    |                         |
| 13  | 2018 | Morse et al. (Malaysia)        |                                                    | ✓          |                      | ✓      |            | ✓    |                         |
| 14  | 2018 | Evers-Wölk et al. (Germany)    | ✓                                                  | ✓          |                      | ✓      |            |      |                         |
| 15  | 2018 | Gregor-Haack (Germany)         | ✓                                                  | ✓          | ✓                    | ✓      |            |      |                         |

| No.                | Year | Author                       | Criteria included in the definition of health apps |            |                      |           |            |           |                         |
|--------------------|------|------------------------------|----------------------------------------------------|------------|----------------------|-----------|------------|-----------|-------------------------|
|                    |      |                              | User                                               | Health aim | Definition of Health | Device    | Regulation | Data      | Technological functions |
| 16                 | 2018 | Groß & Schmidt<br>(Germany)  | ✓                                                  | ✓          |                      | ✓         | ✓          | ✓         | ✓                       |
| 17                 | 2021 | Hetereif et al.<br>(Germany) | ✓                                                  | ✓          |                      |           | ✓          | ✓         | ✓                       |
| 18                 | 2021 | Wang & Qi<br>(China)         | ✓                                                  | ✓          |                      | ✓         |            |           |                         |
| 19                 | 2021 | Volpi et al.<br>(Brazil)     | ✓                                                  | ✓          |                      |           |            | ✓         | ✓                       |
| 20                 | 2021 | Golden et al.<br>(USA)       | ✓                                                  | ✓          |                      | ✓         |            | ✓         | ✓                       |
| 21                 | 2021 | Racioppi et al.<br>(USA)     |                                                    | ✓          |                      | ✓         |            | ✓         | ✓                       |
| 22                 | 2021 | Tobias & Spanier<br>(Israel) | ✓                                                  |            |                      |           |            | ✓         | ✓                       |
| <b>Total count</b> |      |                              | <b>14</b>                                          | <b>22</b>  | <b>4</b>             | <b>12</b> | <b>2</b>   | <b>14</b> | <b>9</b>                |

Table 2. Overview of criteria included in definitions for medical apps

| No.                | Year | Author                      | Criteria included in the definition of medical apps |            |          |            |          |                         |
|--------------------|------|-----------------------------|-----------------------------------------------------|------------|----------|------------|----------|-------------------------|
|                    |      |                             | User                                                | Health aim | Device   | Regulation | Data     | Technological functions |
| 1                  | 2012 | Klasnja & Pratt (USA)       |                                                     | ✓          |          |            | ✓        | ✓                       |
| 2                  | 2014 | Albrecht et. al. (Germany)  | ✓                                                   | ✓          |          |            |          |                         |
| 3                  | 2014 | Aungst et al. (USA)         | ✓                                                   | ✓          |          |            |          |                         |
| 4                  | 2014 | Seabrook et al. (Canada)    | ✓                                                   |            | ✓        |            |          |                         |
| 5                  | 2014 | Gehring et al. (Germany)    |                                                     | ✓          |          |            |          |                         |
| 6                  | 2015 | Lucht et al. (Germany)      | ✓                                                   | ✓          |          |            |          |                         |
| 7                  | 2017 | Kramer (Germany)            | ✓                                                   | ✓          |          |            |          |                         |
| 8                  | 2018 | Evers-Wölk et al. (Germany) | ✓                                                   | ✓          |          | ✓          |          |                         |
| 9                  | 2018 | Gregor-Haack (Germany)      | ✓                                                   | ✓          |          |            |          |                         |
| 10                 | 2018 | Groß & Schmidt (Germany)    | ✓                                                   | ✓          | ✓        | ✓          |          |                         |
| 11                 | 2021 | Moshi et al. (Australia)    | ✓                                                   | ✓          | ✓        |            |          | ✓                       |
| <b>Total count</b> |      |                             | <b>9</b>                                            | <b>10</b>  | <b>3</b> | <b>2</b>   | <b>1</b> | <b>2</b>                |

## References

- Aitken, M. (2015). Patient Adoption of mHealth. Use, Evidence and Remaining Barriers to Mainstream Acceptance. Parsippany, NJ: IMS Institute for Healthcare Informatics.
- Albrecht, U.-V. (2014). Synopsis for Health Apps: Transparency for Trust and Decision Making. In: M. Househ, E. Borycki & A. Kushniruk (Hrsg.), Social Media and Mobile Technologies for Healthcare, (S. 94-108). Hershey: IGI Global.
- Albrecht, U.-V. (2016). Einführung und Begriffsbestimmungen. (Hrsg.), Chancen und Risiken von Gesundheits-Apps (CHARISMHA), (S. 48-61). Braunschweig: Technische Universität Braunschweig.
- Aungst, T.D. (2014). How to identify, assess and utilise mobile medical applications in clinical practice. International Journal of Clinical Practice, 68(2), 155-162.
- Boudreaux, E.D. (2014). Evaluating and selecting mobile health apps: strategies for healthcare providers and healthcare organizations. Translational Behavioral Medicine, 4(4), 363-371.
- European Commission (2014). Green Paper on mobile Health ("mHealth"). Brussels: European Commission.
- Evers-Wölk, M. (2018). Gesundheits-Apps. Innovationsanalyse. TAB-Arbeitsbericht Nr. 179. Berlin: Büro für Technikfolgen-Abschätzung beim Deutschen Bundestag.
- Gehring, H. (2014). Zukunftstrend „Medical Apps“. Bundesgesundheitsblatt - Gesundheitsforschung - Gesundheitsschutz, 57(12), 1402-1410.
- Golden, E.A. (2021). A Resilience-Building App to Support the Mental Health of Health Care Workers in the COVID-19 Era: Design Process, Distribution, and Evaluation. JMIR Form Res, 5(5), e26590.
- Gregor-Haack, J. (2018). Erstattung von Health-Apps durch die gesetzliche Krankenversicherung. Bundesgesundheitsblatt - Gesundheitsforschung - Gesundheitsschutz, 61(3), 328-333.
- Groß, D. (2018). E-Health und Gesundheitsapps aus medizinethischer Sicht. Bundesgesundheitsblatt - Gesundheitsforschung - Gesundheitsschutz, 61(3), 349-357.
- Heretleif, M. (2021). IT-Sicherheit auf dem digitalen Verbrauchermarkt: Fokus Gesundheits-Apps. Berlin: Federal Office of Information Security Germany (BSI).
- Klasnja, P. (2012). Healthcare in the pocket: Mapping the space of mobile-phone health interventions. Journal of Biomedical Informatics, 45(1), 184-198.
- Kramer, U. (2017). Wie gut sind Gesundheits-Apps? Aktuelle Ernährungsmedizin, 42(03), 193-205.
- Lucht, M. (2015). Gesundheits- und Versorgungs-Apps. Hintergründe zu deren Entwicklung und Einsatz. Freiburg: Universitätsklinikum Freiburg.
- Morse, S.S. (2018). Mobile Health Applications for Pediatric Care: Review and Comparison. Therapeutic Innovation & Regulatory Science, 52(3), 383-391.
- Moshi, M.R. (2018). Sustainability of current Evaluation Frameworks for Use in the Health Technology Assessment of mobile medical Applications: A

- Systematic Review. *International Journal of Technology Assessment in Health Care*, 34(5), 464-475.
- Powell, A.C. (2014). In search of a few good apps. *Jama*, 311(18), 1851-1852.
- Racioppi, A. (2021). Assessing the Feasibility of a Novel mHealth App in Hematopoietic Stem Cell Transplant Patients. *Transplant Cell Ther*, 27(2), 181.e181-181.e189.
- Scherenberg, V. (2013). Schöne neue Welt: Gesünder mit Health-Apps? Hintergründe, Handlungsbedarf und schlummernde Potenziale. In: P. Strahlendorf (Hrsg.), *Jahrbuch Healthcare Marketing 2013*, (S. 115-119). New Business.
- Seabrook, H.J. (2014). Medical applications: a database and characterization of apps in Apple iOS and Android platforms. *BMC Research Notes*, 7(1), 573.
- Tobias, G. (2021). Using an mHealth App (iGAM) to Reduce Gingivitis Remotely (Part 2): Prospective Observational Study. *JMIR Mhealth Uhealth*, 9(9), e24955.
- Volpi, S.S. (2021). Using a mobile health app to improve patients' adherence to hypertension treatment: a non-randomized clinical trial. *PeerJ*, 9, e11491.
- Wang, C. (2021). Influencing Factors of Acceptance and Use Behavior of Mobile Health Application Users: Systematic Review. *Healthcare (Basel)*, 9(3).
