# Supplementary material for: The Definitions of Health Apps and Medical Apps From the Perspective of Public Health and Law: Qualitative Analysis of an Interdisciplinary Literature Overview
Source: PubMed Central journal article supplement (PMC9664324; doi:10.2196/37980), 2022-10-31

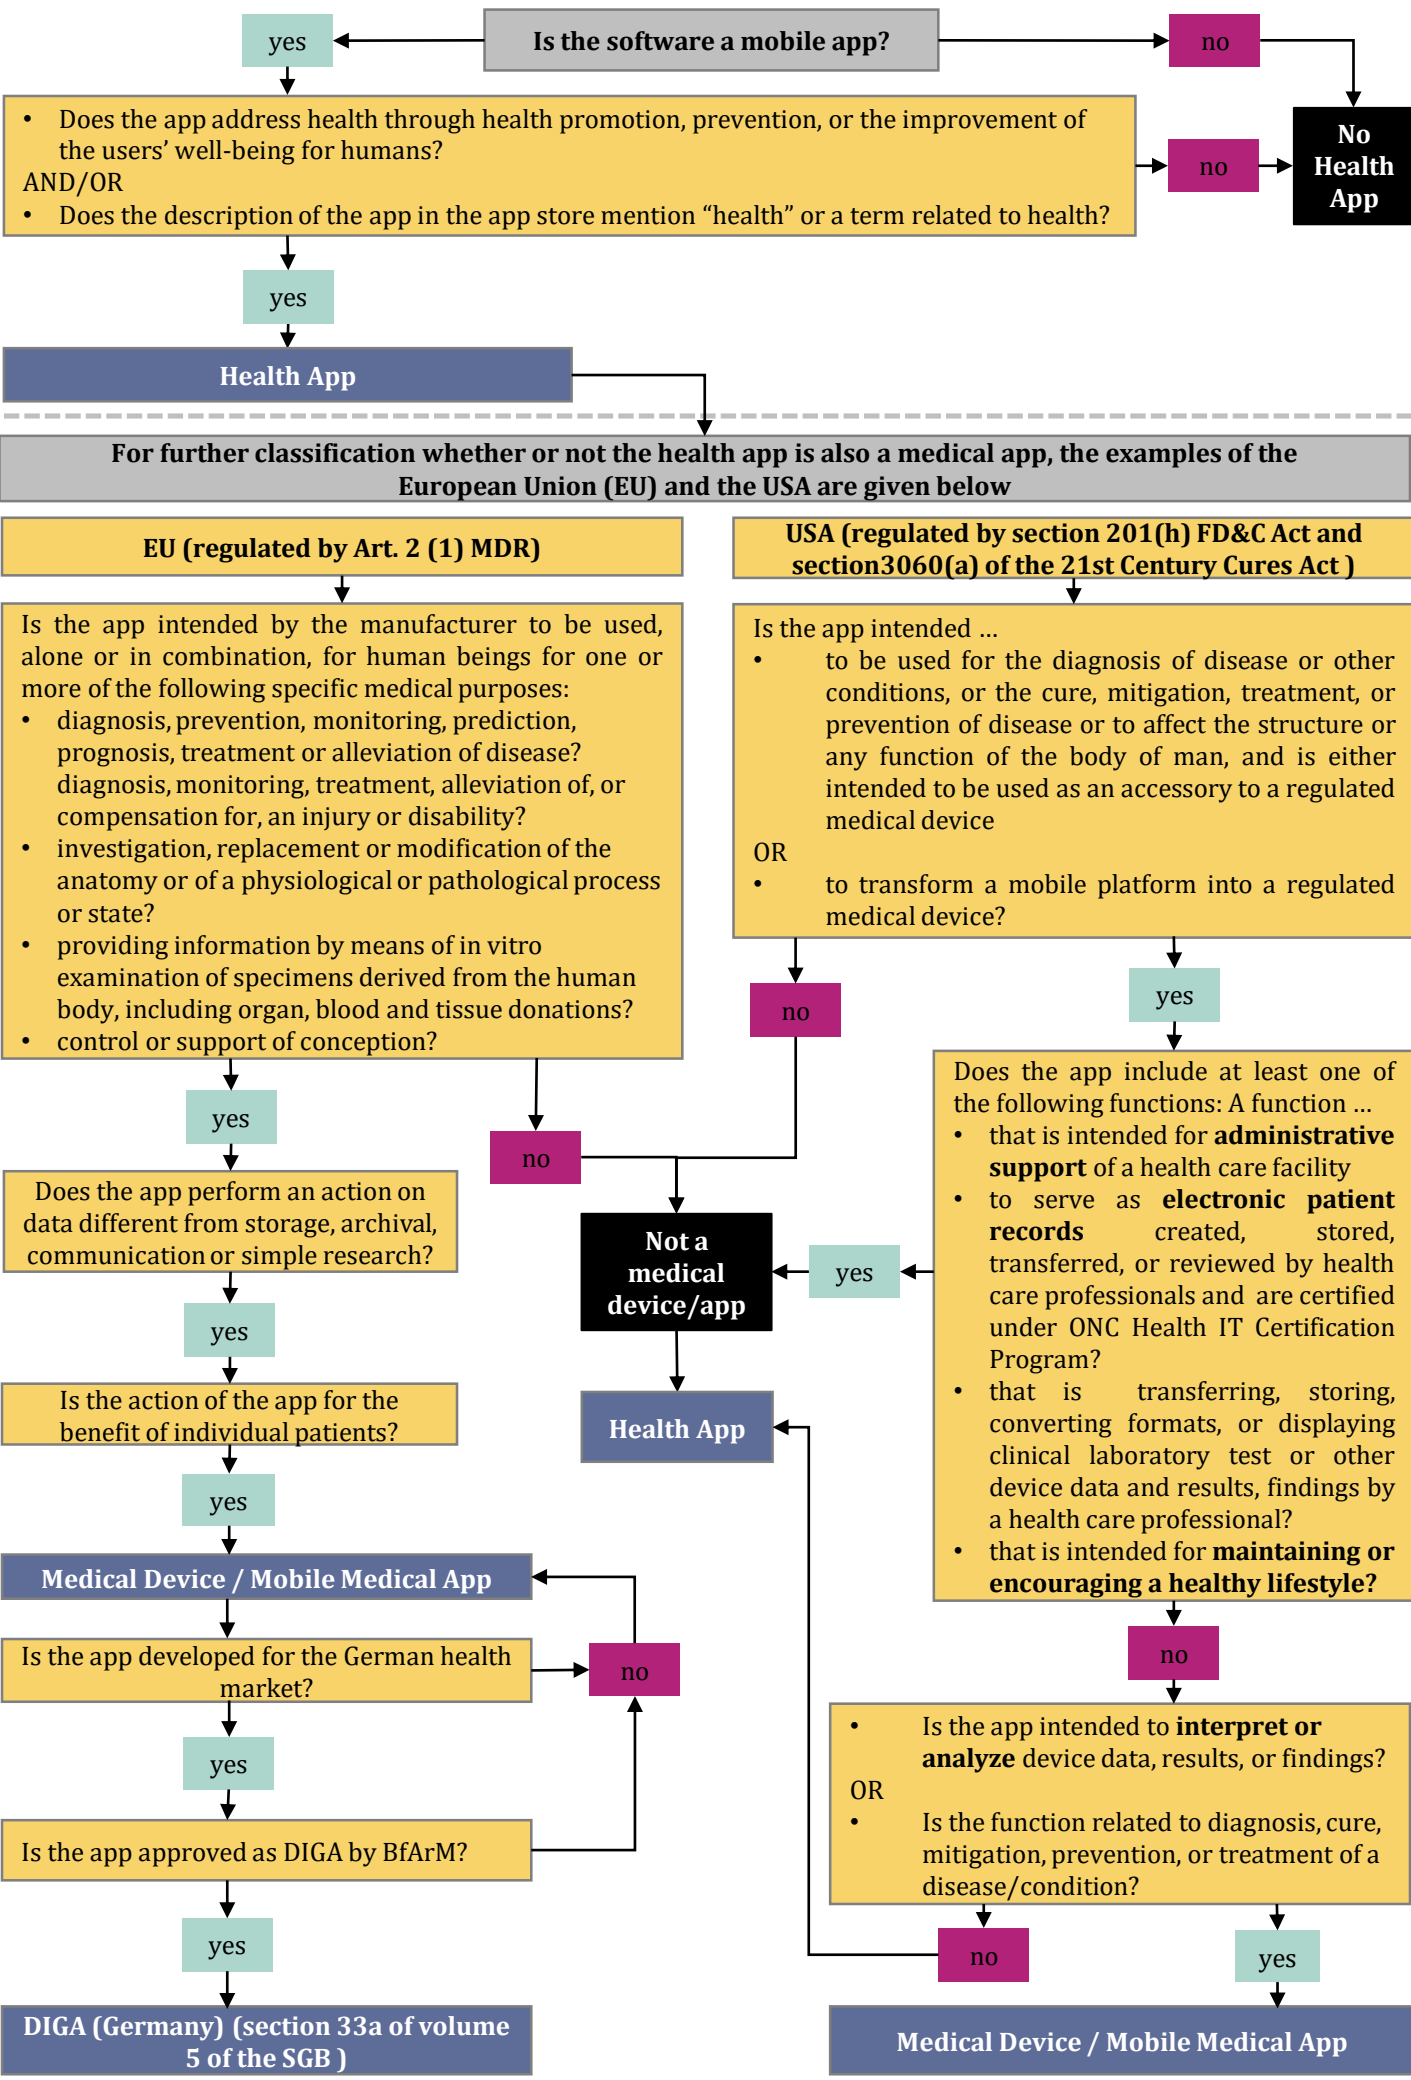

Supplement: mhealth_v10i10e37980_app3.pdf [file mhealth_v10i10e37980_app3.pdf]
